# Supplementary material for: Predictive performance of mortality risk models in sepsis-associated encephalopathy: a systematic review and meta-analysis
Source: Research Square preprint supplement (doi:10.21203/rs.3.rs-7856538/v1), 2025-10-20
Supplement: Supplementary file 2 [file 767bfaaca074056db1335747.docx]

***Search strategy***

**The subject terms and free terms were combined to search the English databases: PubMed, Embase, Web of Science, Cochrane Library, CINAHL. The details are as follows:**

| **PubMed (n=50)** | |
| --- | --- |
| **#1** | "Sepsis-Associated Encephalopathy"[Mesh] |
| **#2** | ((Associated Encephalopathies, Sepsis[Title/Abstract]) OR (Sepsis-Associated Delirium[Title/Abstract])) OR (Associated Deliriums, Sepsis[Title/Abstract]) |
| **#3** | ("Sepsis-Associated Encephalopathy"[Mesh]) OR (((Associated Encephalopathies, Sepsis[Title/Abstract]) OR (Sepsis-Associated Delirium[Title/Abstract])) OR (Associated Deliriums, Sepsis[Title/Abstract])) |
| **#4** | "Nomograms"[Mesh] |
| **#5** | (((((((partin tables[Title/Abstract]) OR (partin nomogram[Title/Abstract])) OR (prognostic model[Title/Abstract])) OR (prediction model[Title/Abstract])) OR (risk model[Title/Abstract])) OR (risk score[Title/Abstract])) OR (risk assessment[Title/Abstract])) OR (predictors[Title/Abstract]) |
| **#6** | ("Nomograms"[Mesh]) OR ((((((((partin tables[Title/Abstract]) OR (partin nomogram[Title/Abstract])) OR (prognostic model[Title/Abstract])) OR (prediction model[Title/Abstract])) OR (risk model[Title/Abstract])) OR (risk score[Title/Abstract])) OR (risk assessment[Title/Abstract])) OR (predictors[Title/Abstract])) |
| **#7** | "Mortality"[Mesh] |
| **#8** | (((((((((Mortality Rate[Title/Abstract]) OR (Death Rate[Title/Abstract])) OR (Mortality, Differential[Title/Abstract])) OR (Mortality, Excess[Title/Abstract])) OR (Mortality Determinants[Title/Abstract])) OR (Case Fatality Rate[Title/Abstract])) OR (Decline, Mortality[Title/Abstract])) OR (Age-Specific Death Rate[Title/Abstract])) OR (Crude Death Rate[Title/Abstract])) OR (Crude Mortality Rate[Title/Abstract]) |
| **#9** | ("Mortality"[Mesh]) OR ((((((((((Mortality Rate[Title/Abstract]) OR (Death Rate[Title/Abstract])) OR (Mortality, Differential[Title/Abstract])) OR (Mortality, Excess[Title/Abstract])) OR (Mortality Determinants[Title/Abstract])) OR (Case Fatality Rate[Title/Abstract])) OR (Decline, Mortality[Title/Abstract])) OR (Age-Specific Death Rate[Title/Abstract])) OR (Crude Death Rate[Title/Abstract])) OR (Crude Mortality Rate[Title/Abstract])) |
| **#10** | #3 AND #6 AND #9 |

| **Embase (n=28)** | |
| --- | --- |
| **#1** | 'Sepsis associated encephalopathy'/exp |
| **#2** | 'Associated encephalopathies, sepsis':ab,ti OR 'sepsis-associated delirium':ab,ti OR 'associated deliriums, sepsis':ab,ti |
| **#3** | #1 OR #2 |
| **#4** | 'Nomogram'/exp |
| **#5** | 'Partin tables':ab,ti OR 'partin nomogram':ab,ti OR 'prognostic model':ab,ti OR 'predictive model':ab,ti OR 'risk score':ab,ti OR 'risk model':ab,ti OR 'risk assessment':ab,ti OR 'predictors':ab,ti |
| **#6** | #4 OR #5 |
| **#7**  **#8** | 'Mortality'/exp  'Mortality rate':ab,ti OR 'death rate':ab,ti OR 'mortality, differential':ab,ti OR 'mortality, excess':ab,ti OR 'mortality determinants':ab,ti OR 'case fatality rate':ab,ti OR 'decline, mortality':ab,ti OR 'age-specific death rate':ab,ti OR 'crude death rate':ab,ti OR 'crude mortality rate':ab,ti |
| **#9** | #7 OR #8 |
| **#10** | #3 AND #6 AND #9 |

| **Web of Science (n=436)** | |
| --- | --- |
| **#1** | (((TS=(Sepsis-Associated Encephalopathy)) OR TS=(Associated Encephalopathies, Sepsis)) OR TS=(Sepsis-Associated Delirium)) OR TS=(Associated Deliriums, Sepsis) |
| **#2** | ((((((((TS=(Nomogram)) OR TS=(partin tables)) OR TS=(partin nomogram)) OR TS=(prognostic model)) OR TS=(prediction model)) OR TS=(risk model)) OR TS=(risk score)) OR TS=(risk assessment)) OR TS=(predictors) |
| **#3** | ((((((((((TS=(mortality)) OR TS=(Mortality Rate)) OR TS=(Death Rate)) OR TS=(Mortality, Differential)) OR TS=(Mortality, Excess)) OR TS=(Mortality Determinants)) OR TS=(Case Fatality Rate)) OR TS=(Decline, Mortality)) OR TS=(Age-Specific Death Rate)) OR TS=(Crude Death Rate)) OR TS=(Crude Mortality Rate) |
| **#4** | #1 AND #2 AND #3 |

| **Cochrane library (n=9)** | |
| --- | --- |
| **#1** | MeSH descriptor: [Sepsis-Associated Encephalopathy] explode all trees |
| **#2** | (Associated Encephalopathies, Sepsis or Sepsis-Associated Delirium or Associated Deliriums, Sepsis):ti,ab,kw |
| **#3** | #1 OR #2 |
| **#4** | MeSH descriptor: [Nomograms] explode all trees |
| **#5** | ("Partin tables" OR "partin nomogram" OR "prognostic model" OR "prediction model" OR "risk model" OR "risk score" OR "risk assessment" OR "predictors"):ti,ab,kw |
| **#6** | #4 OR #5 |
| **#7** | MeSH descriptor: [Mortality] explode all trees |
| **#8** | (Mortality Rate or Death Rate or Mortality, Differential or Mortality, Excess or Mortality Determinants or Case Fatality Rate or Decline, Mortality or Age-Specific Death Rate or Crude Death Rate or Crude Mortality Rate):ti,ab,kw |
| **#9** | #7 OR #8 |
| **#10** | #3 AND #6 AND #9 |

| **EBSCO-CINAHL (n=20)** | |
| --- | --- |
| **#1** | AB ("Sepsis-Associated Encephalopathy" OR "Associated Encephalopathies, Sepsis" OR "Sepsis-Associated Delirium" OR "Associated Deliriums, Sepsis") AND AB ("nomogram" OR "partin tables" OR "partin nomogram" OR "prognostic model" OR "prediction model" OR "risk model" OR "risk score" OR "risk assessment" OR "predictors") AND AB ("mortality" OR "Mortality Rate" OR "Death Rate" OR "Mortality, Differential" OR "Mortality, Excess" OR "Mortality Determinants" OR "Case Fatality Rate" OR "Decline, Mortality" OR "Age-Specific Death Rate" OR "Crude Death Rate" OR "Crude Mortality Rate") |
